# Supplementary material for: Free-electron-laser coherent diffraction images of individual drug-carrying liposome particles in solution
Source: Royal Society of Chemistry journal article supplement (doi:10.1039/c7nr09395k), 2018-01-01
Supplement: c7nr09395k1.pdf [file c7nr09395k1.pdf]

Supporting Information

X-ray Free-Electron-Laser Coherent Diffraction Detects Individual Drug-Carrying Nanoparticles with Low Electron Density

Chi-Feng Huang, Keng S. Liang, Tsui-Ling Hsu, Tsung-Tse Lee, Yi-Yun Chen, Shun-Min Yang, Shih-Hsin Huang, Wei-Hau Chang, Peilin Chen, Kuei-En Peng, Chien-Chun Chen, Ting-Kuo Lee, Cheng-Zhi Shi, Yu-Fang Hu, G. Margaritondo, Tetsuya Ishikawa, Chi-Huey Wong and Y. Hwu\*

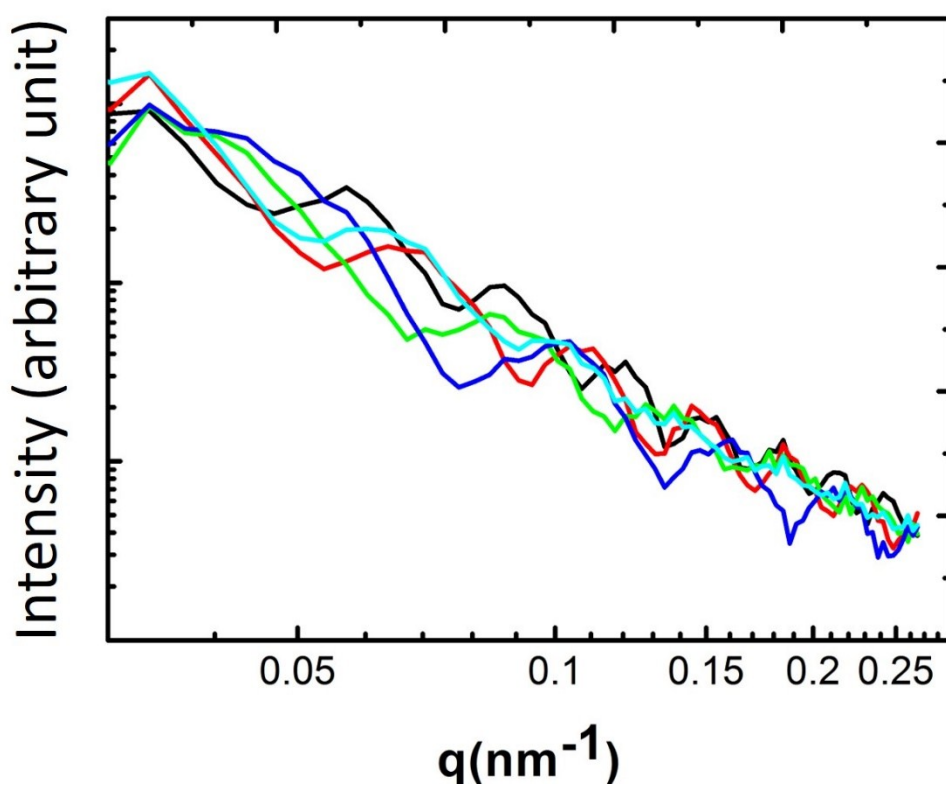

Figure S1. SAXS-like curves derived from our CDI patterns. As explained in the text, each curve corresponding to an individual liposome. The sizes so obtained are in the 100-200 nm range.
